# Supplementary material for: Advanced glycation end-product receptor gene (RAGE) polymorphisms modulate acute coronary syndrome risk in the Polish population
Source: Research Square preprint supplement (doi:10.21203/rs.3.rs-6519950/v1), 2025-05-15
Supplement: Supplementary file 1 [file 8f22aa01e447a8ed02e92aac.docx]

**Supplementary Table 1.** Baseline clinical and biochemical characteristics of patients with acute coronary syndrome (ACS).

|  | **All patients** | **< 50 years** | **≥ 50 years** | P* |
| --- | --- | --- | --- | --- |
|  | N=336 | N=175 | N=161 |  |
| **Female: Male (N)** | 67 : 269 | 36 : 139 | 31 : 130 | NS |
| **Age (years, mean ± SD)** | 51.6 ± 11.3 | 44.2 ± 4.2 | 61.8 ± 12.1 | < 0.0001 |
| **Marital status (%)** |  |  |  |  |
| Married | 77.4 | 80.3 | 72.3 | NS |
| Single | 10.7 | 14.1 | 7.3 | NS |
| Divorced | 1.8 | 0.0 | 3.7 | NS |
| Widowed | 10.1 | 5.6 | 14.7 | 0.01 |
| **Education (%)** |  |  |  |  |
| Primary | 8.9 | 6.9 | 11.1 | NS |
| Vocational | 31.3 | 34.5 | 27.9 | NS |
| Secondary | 41.3 | 36.5 | 46.3 | NS |
| Higher | 18.5 | 22.1 | 14.7 | NS |
| **Employment (%)** |  |  |  |  |
| Unemployed | 2.6 | 2.9 | 2.4 | NS |
| Sedentary work | 43.0 | 47.5 | 38.3 | NS |
| Physical work | 30.7 | 36.7 | 24.5 | 0.03 |
| Retirement | 23.7 | 12.9 | 34.8 | 0.0003 |
| **Family history of CVD** | 53.6 | 62.1 | 44.5 | 0.003 |
| **Smoking** (%) | 80.6 | 86.2 | 69.1 | 0.0005 |
| **Comorbidities (%)** |  |  |  |  |
| Hypertension | 62.5 | 59.3 | 66.4 | NS |
| Type 2 diabetes | 30.4 | 24.2 | 36.4 | 0.02 |
| Depression | 8.3 | 8.1 | 8.5 | NS |
| **Prior treatment (%)** |  |  |  |  |
| ASA | 22.3 | 17.0 | 27.7 | 0.03 |
| Statin | 27.6 | 22.7 | 32.1 | NS |
| β-blocker | 38.3 | 27.7 | 49.6 | 0.0002 |
| ACEi/ARB | 53.7 | 39.7 | 44.4 | NS |
| **STEMI (%)** | 67.2 | 72.0 | 62.9 | 0.04 |
| **BMI (kg/m2)** | 28.0 ± 4.1 | 28.6 ± 4.1 | 27.2 ± 3.8 | 0.002 |
| **Biochemical parameters** |  |  |  |  |
| Total cholesterol (mmol/l) | 5.25 ± 1.2 | 5.5 ± 1.0 | 5.0 ± 1.3 | 0.002 |
| LDL-cholesterol (mmol/l) | 3.4 ± 1.1 | 3.5 ± 1.0 | 3.2 ± 1.1 | NS |
| HDL-cholesterol (mmol/l) | 1.1 ± 0.3 | 1.0 ± 0.2 | 1.1 ± 0.25 | 0.03 |
| Triglycerides (mmol/l) | 1.6 ± 0.8 | 1.9 ± 0.9 | 1.4 ± 0.6 | < 0.0001 |
| Glucose on admission (mmol/l) | 7.4 ± 1.9 | 6.9 ± 1.7 | 7.7 ± 1.9 | 0.0004 |
| FPG (mmol/l) | 5.7 ± 1.1 | 5.4 ± 0.9 | 5.8 ± 1.3 | NS |
| Creatinine (μmol/l) | 94.6 ± 22.1 | 88.4 ± 26.5 | 97.2 ± 17.7 | NS |
| Troponin I (ng/ml) | 28.5 ± 25.1 | 34.1 ± 28.7 | 24.5 ± 22.2 | 0.01 |

* Comparison of groups < 50 and **≥** 50 years

ACEi – angiotensin-converting enzyme inhibitor, ARB – angiotensin receptor blockers, ASA – acetylsalicylic acid, BMI – body mass index, CVD – cardiovascular diseases, FPG – fasting plasma glucose, HDL – high density lipoprotein, LDL – low density lipoprotein, N – number, NS – non significant, SD – standard deviation, STEMI – ST-segment elevation myocardial infarction.
