# Supplementary material for: Advanced glycation end-product receptor gene (RAGE) polymorphisms modulate acute coronary syndrome risk in the Polish population
Source: Research Square preprint supplement (doi:10.21203/rs.3.rs-6519950/v1), 2025-05-15
Supplement: Supplementary file 2 [file a3c1c630b8adcdf000d0203d.docx]

**Acute Coronary Syndrome patient questionnaire**

1. **Basic data**

Patient number: .......................

Gender: F/M

Date of birth (DD/MM/YYYY).......................

Marital status: □ single □ married □ divorced □ widowed

Education: □ primary □ vocational □ secondary □ higher

1. **Co-morbidities**

Hypertension: □ No □ Yes Since: .......................

Hyperlipemia: □ No □ Yes Since: .......................

Diabetes: □ No □ Yes Since: ....................... Type: 1/2/other

Depression □ No □ Yes Since: .......................

Smoking: □ No □ Yes Since:

□ active smoker Cigarettes per day: .......................

□ ex-smoker Date of quitting: .......................

Other: □ No □ Yes

....................................................................................................................................

....................................................................................................................................

....................................................................................................................................

**3. family history of cardiovascular disease:**

Ischaemic heart disease: □ No □ Yes Who: .......................

Myocardial infarction: □ No □ Yes Who: .......................

Stroke/TIA: □ No □ Yes Who: .......................

1. **Current treatment:**

Statin: □ No □ Yes Type: ....................... Dose: .......................

ASA: □ No □ Yes Dose: .......................

ACEi/AT2: □ No □ Yes Type: ....................... Dose: .......................

b-blocker: □ No □ Yes Type: ....................... Dose: .......................

others: □ No □ Yes

....................................................................................................................................

....................................................................................................................................

....................................................................................................................................

1. **Physical examination**

Height (cm) .......................

Body weight (kg) .......................

BMI (kg/m2 .......................

BP (mmHg .......................

HR (per minute) .......................
